# Supplementary material for: Costs of Assisted Home Dialysis: A Single-Payer Canadian Model From Manitoba
Source: PubMed Central journal article supplement (PMC8664694; doi:10.1016/j.xkme.2021.04.019), 2021-07-07
Supplement: mmc1.pdf [file mmc1.pdf]

**Table S1: Scenario analysis – Annual per patient cost of dialysis maintenance therapy by modality in Manitoba, Canada (2019 Canadian dollars) - AHHD care frequency 3.5 times per week**

|                                                                                                                                                                                                                                               | <b>HHD Conventional (3.5x/wk)</b> | <b>Full AHHD (3.5x/wk)</b> | <b>Partial AHHD (3.5x/wk)</b> | <b>AHHD complete care (3.5x/wk)</b> |
|-----------------------------------------------------------------------------------------------------------------------------------------------------------------------------------------------------------------------------------------------|-----------------------------------|----------------------------|-------------------------------|-------------------------------------|
| <b>Human Resources (Direct)</b>                                                                                                                                                                                                               |                                   |                            |                               |                                     |
| Registered Nurse                                                                                                                                                                                                                              | \$1,109.94                        | \$1,566.45                 | \$1,566.45                    | \$1,566.45                          |
| Unit Clerk                                                                                                                                                                                                                                    | \$268.53                          | \$268.53                   | \$268.53                      | \$268.53                            |
| LPN                                                                                                                                                                                                                                           | \$0.00                            | \$6,145.89                 | \$6,145.89                    | \$6,145.89                          |
| Renal Dietician                                                                                                                                                                                                                               | \$567.19                          | \$567.19                   | \$567.19                      | \$567.19                            |
| Dialysis Technician                                                                                                                                                                                                                           | \$1,943.01                        | \$1,943.01                 | \$1,943.01                    | \$1,943.01                          |
| Clinical Pharmacist                                                                                                                                                                                                                           | \$870.19                          | \$870.19                   | \$870.19                      | \$870.19                            |
| Social Worker                                                                                                                                                                                                                                 | \$383.18                          | \$383.18                   | \$383.18                      | \$383.18                            |
| HCA                                                                                                                                                                                                                                           | \$0.00                            | \$2,677.56                 | \$0.00                        | \$14,321.48                         |
|                                                                                                                                                                                                                                               |                                   |                            |                               |                                     |
| <b>Total Human Resources</b>                                                                                                                                                                                                                  | <b>\$5,142.03</b>                 | <b>\$14,421.98</b>         | <b>\$11,744.43</b>            | <b>\$26,065.91</b>                  |
| Benefits                                                                                                                                                                                                                                      | \$1,036.12                        | \$2,906.03                 | \$2,366.50                    | \$5,252.28                          |
| Vacation and Relief                                                                                                                                                                                                                           | \$1,008.87                        | \$2,829.59                 | \$2,304.26                    | \$5,114.13                          |
| Milage, Communications, etc.                                                                                                                                                                                                                  | \$0.00                            | \$368.63                   | \$368.63                      | \$368.63                            |
| Supplies - Medical, Surgical, and Laboratory                                                                                                                                                                                                  | \$12,132.71                       | \$12,132.71                | \$12,132.71                   | \$12,132.71                         |
| Supplies - Other (e.g. Housekeeping, Maintenance)                                                                                                                                                                                             | \$2,907.54                        | \$3,392.13                 | \$3,392.13                    | \$3,392.13                          |
| Drug Expenses                                                                                                                                                                                                                                 | \$3,184.98                        | \$3,184.98                 | \$3,184.98                    | \$3,184.98                          |
| Equipment Expenses                                                                                                                                                                                                                            | \$4,528.04                        | \$4,528.04                 | \$4,528.04                    | \$4,528.04                          |
| Departmental Sundry / Miscellaneous                                                                                                                                                                                                           | \$123.99                          | \$146.71                   | \$141.39                      | \$169.86                            |
| Hospital Utilities/Overhead (Electricity/Heat)                                                                                                                                                                                                | \$77.76                           | \$77.76                    | \$77.76                       | \$77.76                             |
| Water                                                                                                                                                                                                                                         | \$470.95                          | \$470.95                   | \$470.95                      | \$470.95                            |
| Capital Cost                                                                                                                                                                                                                                  | \$3,212.65                        | \$3,212.65                 | \$3,212.65                    | \$3,212.65                          |
| In-Centre Runs                                                                                                                                                                                                                                | \$4,601.92                        | \$4,601.92                 | \$4,601.92                    | \$4,601.92                          |
| <b>Total</b>                                                                                                                                                                                                                                  | <b>\$38,427.56</b>                | <b>\$52,274.09</b>         | <b>\$48,526.34</b>            | <b>\$68,571.96</b>                  |
| CAPD, continuous ambulatory peritoneal dialysis, CCPD, continuous cycling peritoneal dialysis, aHHD, assisted home hemodialysis, aCCPD, continuous cycling assisted peritoneal dialysis, LPN, licensed practical nurse, HCA, health care aide |                                   |                            |                               |                                     |

**Table S2: Scenario analysis – Annual per patient cost of dialysis maintenance therapy by modality in Manitoba, Canada (2019 Canadian dollars) - health care aide staffing model**

|                                                   | In-Centre Hemodialysis | PD (CAPD)         | PD (CCPD)         | HHD Conventional (3x/wk) | Full AHHD (3x/wk) | Partial AHHD (3x/wk) | AHHD complete care (3x/wk) | Partial ACCPD (daily) | Full ACCPD (daily) |
|---------------------------------------------------|------------------------|-------------------|-------------------|--------------------------|-------------------|----------------------|----------------------------|-----------------------|--------------------|
| <b>Human Resources (Direct)</b>                   |                        |                   |                   |                          |                   |                      |                            |                       |                    |
| Registered Nurse                                  | \$19,594.00            | \$1,933.44        | \$1,933.44        | \$1,109.94               | \$0.00            | \$0.00               | \$0.00                     | \$0.00                | \$0.00             |
| Unit Clerk                                        | \$1,163.65             | \$295.39          | \$295.39          | \$268.53                 | \$268.53          | \$268.53             | \$268.53                   | \$295.39              | \$295.39           |
| LPN                                               | \$9,608.66             | \$0.00            | \$0.00            | \$0.00                   | \$0.00            | \$0.00               | \$0.00                     | \$0.00                | \$0.00             |
| Renal Dietician                                   | \$685.35               | \$472.65          | \$472.65          | \$567.19                 | \$567.19          | \$567.19             | \$567.19                   | \$472.65              | \$472.65           |
| Dialysis Technician                               | \$645.17               | \$0.00            | \$0.00            | \$1,943.01               | \$1,943.01        | \$1,943.01           | \$1,943.01                 | \$0.00                | \$0.00             |
| Clinical Pharmacist                               | \$428.79               | \$327.90          | \$327.90          | \$870.19                 | \$870.19          | \$870.19             | \$870.19                   | \$327.90              | \$327.90           |
| Social Worker                                     | \$469.20               | \$383.18          | \$383.18          | \$383.18                 | \$383.18          | \$383.18             | \$383.18                   | \$383.18              | \$383.18           |
| HCA                                               | \$0.00                 | \$0.00            | \$0.00            | \$0.00                   | \$5,355.11        | \$3,060.06           | \$17,338.65                | \$7,040.05            | \$12,320.10        |
|                                                   |                        |                   |                   |                          |                   |                      |                            |                       |                    |
| <b>Total Human Resources</b>                      | <b>\$32,594.81</b>     | <b>\$3,412.56</b> | <b>\$3,412.56</b> | <b>\$5,142.03</b>        | <b>\$9,387.20</b> | <b>\$7,092.15</b>    | <b>\$21,370.74</b>         | <b>\$8,519.17</b>     | <b>\$13,799.21</b> |
| Benefits                                          | \$6,567.85             | \$687.63          | \$687.63          | \$1,036.12               | \$1,891.52        | \$1,429.07           | \$4,306.20                 | \$1,716.61            | \$2,780.54         |
| Vacation and Relief                               | \$6,395.10             | \$669.54          | \$669.54          | \$1,008.87               | \$1,841.77        | \$1,391.48           | \$4,192.94                 | \$1,671.46            | \$2,707.41         |
| Milage, Communications, etc.                      | \$0.00                 | \$0.00            | \$0.00            | \$0.00                   | \$102.21          | \$102.21             | \$102.21                   | \$745.24              | \$1,304.16         |
| Supplies - Medical, Surgical, and Laboratory      | \$7,844.36             | \$24,487.64       | \$36,295.34       | \$10,399.47              | \$10,399.47       | \$10,399.47          | \$10,399.47                | \$36,295.34           | \$36,295.34        |
| Supplies - Other (e.g. Housekeeping, Maintenance) | \$837.82               | \$333.64          | \$333.64          | \$2,907.54               | \$2,907.54        | \$2,907.54           | \$2,907.54                 | \$333.64              | \$333.64           |
| Drug Expenses                                     | \$6,004.55             | \$3,236.88        | \$3,236.88        | \$3,184.98               | \$3,184.98        | \$3,184.98           | \$3,184.98                 | \$3,236.88            | \$3,236.88         |
| Equipment Expenses                                | \$580.35               | \$0.00            | \$0.00            | \$4,528.04               | \$4,528.04        | \$4,528.04           | \$4,528.04                 | \$0.00                | \$0.00             |
| Departmental Sundry / Miscellaneous               | \$141.15               | \$147.08          | \$206.12          | \$115.33                 | \$124.28          | \$119.71             | \$148.11                   | \$220.00              | \$233.29           |

|                                                   |                    |                    |                    |                    |                    |                    |                    |                    |                    |
|---------------------------------------------------|--------------------|--------------------|--------------------|--------------------|--------------------|--------------------|--------------------|--------------------|--------------------|
| Hospital Utilities/Overhead<br>(Electricity/Heat) | \$222.40           | \$77.76            | \$77.76            | \$77.76            | \$77.76            | \$77.76            | \$77.76            | \$77.76            | \$77.76            |
| Water                                             | \$428.17           | \$0.00             | \$0.00             | \$403.67           | \$403.67           | \$403.67           | \$403.67           | \$0.00             | \$0.00             |
| Capital Cost                                      | \$5,798.99         | \$3,212.65         | \$3,212.65         | \$3,212.65         | \$3,212.65         | \$3,212.65         | \$3,212.65         | \$3,212.65         | \$3,212.65         |
| In-Centre Runs                                    | \$0.00             | \$0.00             | \$0.00             | \$4,601.92         | \$4,601.92         | \$4,601.92         | \$4,601.92         | \$0.00             | \$0.00             |
| <b>Total</b>                                      | <b>\$67,415.55</b> | <b>\$36,265.39</b> | <b>\$48,132.13</b> | <b>\$36,618.37</b> | <b>\$42,663.01</b> | <b>\$39,450.66</b> | <b>\$59,436.23</b> | <b>\$56,028.76</b> | <b>\$63,980.89</b> |

CAPD, continuous ambulatory peritoneal dialysis, CCPD, continuous cycling peritoneal dialysis, aHHD, assisted home hemodialysis, aCCPD, continuous cycling assisted peritoneal dialysis, LPN, licensed practical nurse, HCA, health care aide
